# Supplementary material for: Metabolomics and Proteomics Characterizing Hepatic Reactions to Dietary Linseed Oil in Duck
Source: MDPI journal article supplement (doi:10.3390/ijms232415690), 2022-12-10
Supplement: s1 [file s1]

## Supplemental Tables and Figures

Supplemental Table S1 Differential metabolites in the positive ion mode

| Metabolites                                                                                                | VIP   | Fold change | <i>P</i> value |
|------------------------------------------------------------------------------------------------------------|-------|-------------|----------------|
| 1-stearoyl-2-docosaheptaenoyl-sn-glycero-3-phosphocholine                                                  | 7.26  | 2.25        | <0.0001        |
| 1-palmitoyl-2-docosaheptaenoyl-sn-glycero-3-phosphocholine                                                 | 15.12 | 2.58        | <0.0001        |
| Monolinolenin (9c,12c,15c)                                                                                 | 3.00  | 2.82        | <0.0001        |
| 1,2-dioleoyl-sn-glycero-3-phospho-1-serine                                                                 | 1.60  | 1.97        | <0.0001        |
| 4-[5-[[4-[5-[acetyl(hydroxy)amino]pentylamino]-4-oxobutanoyl]-hydroxyamino]pentylamino]-4-oxobutanoic acid | 1.68  | 1.54        | 0.0001         |
| 1,2-dioleoyl-sn-glycerol                                                                                   | 1.28  | 1.77        | 0.0001         |
| 1-Stearoyl-sn-glycerol 3-phosphocholine                                                                    | 4.25  | 2.31        | 0.0002         |
| 2-docosaheptaenoyl-1-palmitoyl-sn-glycero-3-phosphoethanolamine                                            | 1.92  | 2.73        | 0.0002         |
| 1-hexadecanoyl-2-octadecadienoyl-sn-glycero-3-phosphocholine                                               | 19.84 | 1.41        | 0.0003         |
| 2-oleoyl-1-palmitoyl-sn-glycero-3-phosphocholine                                                           | 20.54 | 0.78        | 0.0003         |
| Lpc 18:2                                                                                                   | 8.14  | 1.77        | 0.0005         |
| 1-palmitoyl-2-linoleoyl-sn-glycero-3-phosphocholine                                                        | 12.62 | 1.77        | 0.0006         |
| 1-stearoyl-2-linoleoyl-sn-glycero-3-phosphoethanolamine                                                    | 2.33  | 1.40        | 0.0010         |
| Thioetheramide-PC                                                                                          | 5.28  | 2.35        | 0.0011         |
| 1-hexadecyl-2-(8z,11z,14z-eicosatrienoyl)-sn-glycero-3-phosphocholine                                      | 1.76  | 2.26        | 0.0012         |
| 2-arachidonoylglycerol                                                                                     | 1.42  | 0.59        | 0.0028         |
| 1,2-dilinoleoylglycerol                                                                                    | 3.10  | 1.54        | 0.0032         |
| Thymine                                                                                                    | 2.70  | 3.25        | 0.0035         |
| Melezitose                                                                                                 | 7.03  | 0.36        | 0.0069         |
| Erlose                                                                                                     | 1.10  | 0.34        | 0.0075         |
| 1-palmitoyl-2-linoleoyl-rac-glycerol                                                                       | 3.51  | 1.39        | 0.0083         |
| 1-Stearoyl-2-oleoyl-sn-glycerol 3-phosphocholine (SOPC)                                                    | 1.06  | 0.86        | 0.0083         |
| 1-Stearoyl-2-arachidonoyl-sn-glycerol                                                                      | 1.30  | 0.39        | 0.0100         |
| Stachyose                                                                                                  | 1.40  | 0.43        | 0.0107         |
| Trigonelline                                                                                               | 2.64  | 0.35        | 0.0108         |
| PC(16:0/16:0)                                                                                              | 7.63  | 2.12        | 0.0142         |
| 1,2-dioleoyl-sn-glycero-3-phosphatidylcholine                                                              | 6.71  | 1.33        | 0.0164         |
| 1-oleoyl-2-myristoyl-sn-glycero-3-phosphocholine                                                           | 2.42  | 0.67        | 0.0188         |
| 1-palmitoyl-2-hydroxy-sn-glycero-3-phosphoethanolamine                                                     | 2.33  | 0.80        | 0.0194         |

|                                                           |       |      |        |
|-----------------------------------------------------------|-------|------|--------|
| Cytidine 5'-diphosphocholine                              | 1.68  | 0.79 | 0.0202 |
| .epsilon.-caprolactam                                     | 2.90  | 6.12 | 0.0267 |
| Desisopropyldisopyramide                                  | 1.34  | 1.87 | 0.0286 |
| 2-linoleoyl-1-palmitoyl-sn-glycero-3-phosphoethanolamine  | 1.63  | 1.23 | 0.0337 |
| Pro-leu                                                   | 1.31  | 1.34 | 0.0361 |
| Met-Met-Arg                                               | 1.21  | 0.54 | 0.0387 |
| Tegaserod                                                 | 2.63  | 1.59 | 0.0417 |
| Pro-pro                                                   | 1.83  | 0.41 | 0.0437 |
| Hexanoyl-l-carnitine                                      | 1.64  | 0.52 | 0.0467 |
| Linoleoylcarnitine                                        | 1.96  | 1.71 | 0.0478 |
| 1-octadecanoyl-2-octadecenoyl-sn-glycero-3-phosphocholine | 11.67 | 0.84 | 0.0479 |

Supplemental Table S2 Differential metabolites in the negative ion mode

| Metabolites                                                               | VIP   | Fold change | <i>P</i> value |
|---------------------------------------------------------------------------|-------|-------------|----------------|
| Pc(16:1e/17-hdohe)                                                        | 3.35  | 2.28        | <0.0001        |
| Pc(18:1e/20-hdohe)                                                        | 1.68  | 2.01        | <0.0001        |
| Ps 40:4                                                                   | 1.98  | 0.58        | <0.0001        |
| Linolenic acid                                                            | 11.75 | 5.54        | <0.0001        |
| 1-hexadecanoyl-2-(9z-octadecenoyl)-sn-glycero-3-phospho-(1'-myo-inositol) | 3.97  | 3.26        | <0.0001        |
| Pc(18:1e/9-hode)                                                          | 2.18  | 1.77        | <0.0001        |
| 2-docosaheptaenoyl-1-stearoyl-sn-glycero-3-phosphoserine                  | 6.04  | 3.52        | 0.0001         |
| Pe(16:1e/14-hdohe)                                                        | 7.05  | 2.39        | 0.0002         |
| Raspberry ketone                                                          | 1.24  | 11.72       | 0.0002         |
| 1,2-distearoyl-sn-glycero-3-phospho-l-serine                              | 3.77  | 2.21        | 0.0002         |
| Ginsenoside rg5                                                           | 4.43  | 7.92        | 0.0003         |
| Cis-4,7,10,13,16,19-docosaheptaenoic acid                                 | 8.26  | 2.75        | 0.0004         |
| Ile-Pro                                                                   | 5.94  | 2.43        | 0.0004         |
| 1-palmitoyl-2-linoleoyl-sn-glycero-3-phospho-(1'-rac-glycerol)            | 1.70  | 0.77        | 0.0006         |
| Pi 36:2                                                                   | 1.95  | 1.85        | 0.0008         |
| Cis-7,10,13,16-docosatetraenoic acid                                      | 6.79  | 0.41        | 0.0009         |
| 4'-demethylpodophyllotoxin                                                | 1.13  | 0.33        | 0.0011         |
| His-ser                                                                   | 6.91  | 3.94        | 0.0012         |

|                                                                       |       |      |        |
|-----------------------------------------------------------------------|-------|------|--------|
| Pi 36:4                                                               | 1.97  | 0.67 | 0.0016 |
| Eicosapentaenoic Acid                                                 | 1.03  | 2.21 | 0.0020 |
| Hippuric acid                                                         | 1.04  | 0.24 | 0.0028 |
| Pyruvaldehyde                                                         | 1.62  | 0.52 | 0.0040 |
| Pe(16:1e/14,15-epete)                                                 | 1.06  | 1.97 | 0.0042 |
| NCGC00169011-01                                                       | 5.52  | 7.32 | 0.0042 |
| Linoleic acid                                                         | 12.62 | 1.50 | 0.0053 |
| Maltotriose                                                           | 6.59  | 0.34 | 0.0055 |
| Pg 40:5                                                               | 1.31  | 0.60 | 0.0072 |
| D-allose                                                              | 15.48 | 0.52 | 0.0079 |
| D-Maltose                                                             | 2.53  | 0.39 | 0.0087 |
| D-Sorbitol                                                            | 2.08  | 0.51 | 0.0094 |
| 1-oleoyl-sn-glycero-3-phosphoethanolamine                             | 1.14  | 0.75 | 0.0108 |
| Gamma-Glu-Cys                                                         | 16.32 | 0.17 | 0.0111 |
| Dehydroascorbic acid (Oxidized vitamin C)                             | 2.08  | 0.61 | 0.0114 |
| Maltotetraose                                                         | 1.48  | 0.45 | 0.0127 |
| D-(+)-mannose                                                         | 3.59  | 0.48 | 0.0134 |
| Pc(16:0e/8-hepe)                                                      | 3.27  | 0.71 | 0.0143 |
| D-Tagatose                                                            | 3.44  | 0.57 | 0.0160 |
| Fahfa 36:4                                                            | 1.13  | 2.21 | 0.0169 |
| D-glucono-1,5-lactone                                                 | 1.24  | 0.67 | 0.0178 |
| Pg 36:3                                                               | 18.56 | 1.39 | 0.0179 |
| L-Glutamine                                                           | 1.67  | 0.53 | 0.0184 |
| Paxilline                                                             | 3.26  | 3.58 | 0.0191 |
| Phenylpyruvate                                                        | 1.22  | 3.78 | 0.0234 |
| Osmanthuside h                                                        | 1.71  | 0.20 | 0.0282 |
| 1-palmitoyl-2-oleoyl-phosphatidylglycerol                             | 1.93  | 0.78 | 0.0289 |
| Xanthine                                                              | 7.67  | 0.81 | 0.0325 |
| L-pyroglutamic acid                                                   | 2.01  | 0.60 | 0.0370 |
| Pc(16:0e/5,6-eet)                                                     | 1.33  | 0.79 | 0.0379 |
| Cis,cis-muconic acid                                                  | 4.70  | 1.17 | 0.0394 |
| 1-(9z,12z-octadecadienoyl)-2-hydroxy-sn-glycero-3-phosphoethanolamine | 1.25  | 1.28 | 0.0414 |
| Pe(16:0e/10-hdohe)                                                    | 2.27  | 0.50 | 0.0437 |

Supplemental Table S3 Differential expression proteins between linseed oil group and the control group

| Accession  | Gene name                                                            | Protein description | HL/CL | P value |
|------------|----------------------------------------------------------------------|---------------------|-------|---------|
|            | Fibronectin type III and SPRY domain-containing protein 2 (Fragment) | Anapl_07374         | 7.08  | 0.0054  |
| A0A493T552 | Uridine-cytidine kinase                                              | UCK1                | 6.21  | 0.0151  |
| U3J3V0     | Peptidyl-prolyl cis-trans isomerase                                  | PIN1                | 5.49  | 0.0154  |
| R0JLK7     | Cytochrome P450 8B1 (Fragment)                                       | Anapl_08712         | 4.33  | 0.0443  |
| U3IEW1     | Galectin                                                             | LGALS3              | 4.26  | 0.0208  |
| R0L4X9     | Membrane-associated progesterone receptor component 1                | Anapl_02476         | 3.74  | 0.0166  |
| U3J7S6     | Uncharacterized protein                                              |                     | 3.70  | 0.0196  |
| A0A493T751 | Cullin associated and neddylation dissociated 2 (putative)           | CAND2               | 3.53  | 0.0237  |
| R0KU23     | Uncharacterized protein (Fragment)                                   | Anapl_10169         | 3.49  | 0.0453  |
| R0LCE7     | Nucleolar complex protein 2 homolog (Fragment)                       | Anapl_09858         | 3.11  | 0.0288  |
| R0LDI0     | Gastric intrinsic factor                                             | Anapl_15309         | 3.00  | 0.0003  |
| R0LXV8     | Sarcalumenin (Fragment)                                              | Anapl_13158         | 2.76  | 0.0383  |
| R0L7K1     | Reticulocalbin-2 (Fragment)                                          | Anapl_15847         | 2.76  | 0.0432  |
| U3IKQ9     | Ethanolamine-phosphate phospho-lyase                                 | ETNPPL              | 2.70  | 0.0144  |
| A0A493SUB3 | Myosin IF                                                            | MYO1F               | 2.54  | 0.0125  |
| R0L6N1     | Histone H2A (Fragment)                                               | Anapl_12366         | 2.42  | 0.0273  |
| R0LGS0     | Tax1-binding protein 1-like protein (Fragment)                       | Anapl_07940         | 2.39  | 0.0121  |
| R0KAX8     | Small monomeric GTPase (Fragment)                                    | Anapl_15468         | 2.38  | 0.0413  |
| A0A493U0U2 | Kinesin family member 21A                                            | KIF21A              | 2.35  | 0.0291  |
| U3IDA2     | WD repeat domain 3                                                   | WDR3                | 2.32  | 0.0105  |
| R0LQ12     | 23 kDa cortical cytoskeleton-associated protein (Fragment)           | Anapl_03819         | 2.30  | 0.0015  |
| A0A493U208 | Phosphatidate phosphatase                                            | LPIN2               | 2.28  | 0.0135  |
| A0A493TDB7 | Interferon related developmental                                     | IFRD1               | 2.26  | 0.0195  |

|            |                                                                                |             |  |      |        |
|------------|--------------------------------------------------------------------------------|-------------|--|------|--------|
|            | regulator 1                                                                    |             |  |      |        |
| A0A493T3T7 | Glycos_transf_1 domain-containing protein                                      |             |  | 2.24 | 0.0143 |
| R0KUZ8     | Putative aarF domain-containing protein kinase 5 (Fragment)                    | Anapl_18263 |  | 2.22 | 0.0086 |
| R0JAZ4     | ORM1-like protein 3 (Fragment)                                                 | Anapl_16259 |  | 2.19 | 0.0004 |
| U3IAM4     | Uncharacterized protein                                                        |             |  | 2.13 | 0.0303 |
| A0A493SWX0 | SH3 domain-containing protein                                                  | SH3CP       |  | 2.12 | 0.0179 |
| U3IJ50     | Nuclear receptor coactivator                                                   | NCOA2       |  | 2.06 | 0.0053 |
|            | Vesicle transport through interaction with t-SNAREs-like protein 1A (Fragment) |             |  |      |        |
| R0LHG8     |                                                                                | Anapl_03516 |  | 2.03 | 0.0375 |
| R0LPR2     | U2-associated protein SR140 (Fragment)                                         | Anapl_07670 |  | 2.02 | 0.0172 |
| U3IH32     | Kelch like family member 41                                                    | KLHL41      |  | 2.01 | 0.0433 |
| R0JRJ5     | Chloride channel protein (Fragment)                                            | Anapl_03383 |  | 2.01 | 0.0125 |
| A0A493TTK8 | Uncharacterized protein                                                        |             |  | 0.49 | 0.0024 |
| R0KLG8     | Ras-related protein Rab-5 A (Fragment)                                         | Anapl_15196 |  | 0.49 | 0.0040 |
| R0KE13     | Laminin subunit alpha-2 (Fragment)                                             | Anapl_01843 |  | 0.48 | 0.0057 |
| R0J7A6     | Inositol-3-phosphate synthase (Fragment)                                       | Anapl_18461 |  | 0.48 | 0.0403 |
| R0LSM4     | ES1 protein-like protein, mitochondrial (Fragment)                             | Anapl_12642 |  | 0.48 | 0.0246 |
| U3IIN8     | 5-AMP-activated protein kinase catalytic subunit alpha-2                       | PRKAA2      |  | 0.47 | 0.0229 |
| U3IE85     | Peroxiredoxin-like 2 activated in M-CSF stimulated monocytes                   | PAMM        |  | 0.47 | 0.0449 |
| A0A493SUY7 | Arrestin beta 1                                                                | ARRB1       |  | 0.47 | 0.0340 |
| U3J4Z7     | Beta-mannosidase                                                               | MANBA       |  | 0.45 | 0.0480 |
| A0A493SVI8 | Uncharacterized protein                                                        |             |  | 0.45 | 0.0134 |
| R0JIG8     | Actin-binding Rho-activating protein (Fragment)                                | Anapl_16253 |  | 0.45 | 0.0073 |
| A0A493U0R0 | S-adenosylmethionine synthase                                                  | MAT2A       |  | 0.44 | 0.0025 |
| U3J9N5     | Asparagine synthetase                                                          | ASNS        |  | 0.44 | 0.0215 |

|            |                                                                                |             |      |        |
|------------|--------------------------------------------------------------------------------|-------------|------|--------|
|            | [glutamine-hydrolyzing]                                                        |             |      |        |
| A0A493TZB0 | Iso_dh domain-containing protein                                               |             | 0.42 | 0.0038 |
| R0J6M7     | Alcohol dehydrogenase 1 (Fragment)                                             | Anapl_18753 | 0.41 | 0.0275 |
| A0A493TUD7 | SET and MYND domain containing 3                                               | SMYD3       | 0.40 | 0.0178 |
| U3IIW2     | Fatty acid desaturase 2 (Fragment)                                             | FADS2       | 0.39 | 0.0382 |
| U3IIQ2     | Complex I-23kD                                                                 |             | 0.39 | 0.0091 |
| U3J4C8     | Fatty acid binding protein 7                                                   | FABP7       | 0.38 | 0.0123 |
| U3IBQ1     | Phospholipid-transporting ATPase                                               | ATP11C      | 0.38 | 0.0032 |
| R0M1C6     | Protein unc-45 homolog B (Fragment)                                            | Anapl_01676 | 0.38 | 0.0151 |
| A0A493SVN5 | Actin binding LIM protein family member 3                                      | ABLIM3      | 0.33 | 0.0253 |
| R0K5A7     | NADPH-dependent diflavin oxidoreductase 1 (Fragment)                           | Anapl_03059 | 0.30 | 0.0280 |
| R0JU11     | Centaurin-alpha-1 (Fragment)                                                   | Anapl_00457 | 0.26 | 0.0180 |
| U3IW82     | Dihydrolipoamide acetyltransferase component of pyruvate dehydrogenase complex | PDHX        | 0.25 | 0.0434 |
| R0LE86     | Intraflagellar transport protein 20-like protein (Fragment)                    | Anapl_18397 | 0.25 | 0.0190 |
| U3IZG5     | Myotilin                                                                       | MYOT        | 0.24 | 0.0475 |
| U3I4A4     | Myopalladin                                                                    | MYPN        | 0.21 | 0.0004 |
| R0KVJ5     | Oxoglutarate dehydrogenase (succinyl-transferring) (Fragment)                  | Anapl_18489 | 0.16 | 0.0308 |
| U3IUW7     | Calsequestrin                                                                  | CASQ2       | 0.15 | 0.0487 |

Supplemental Table S4 Composition and nutrient level of the basic diet

| Ingredient (%)      | Content (%) | Nutrient level       | Content (%) |
|---------------------|-------------|----------------------|-------------|
| Corn                | 48.12       | AME (MJ/kg)          | 11.54       |
| Soybean meal        | 24.72       | CP (%)               | 17.88       |
| Flour               | 18.02       | EE (%)               | 5.88        |
| Rice bran           | 5.10        | CF (%)               | 3.66        |
| Dicalcium phosphate | 1.68        | Ca (%)               | 0.91        |
| Limestone           | 1.02        | Total phosphorus (%) | 0.77        |
| Salt                | 0.31        | Lys (%)              | 0.92        |
| Premix <sup>1</sup> | 1.02        |                      |             |
| Total               | 100         |                      |             |

Note: AME: apparent matabolizable energy; CP: crude protein; EE: ether extract; CF: crude fiber; Lys: lysine. <sup>1</sup>Vitamin and mineral premixes supplied per kilogram diet: vitamin A, 9,000 IU; vitamin D<sub>3</sub>, 3,000 IU; vitamin E, 79 mg; vitamin B<sub>2</sub>, 8 mg; vitamin K<sub>3</sub>, 2 mg; pantothenic acid, 3.2 mg; niacin, 11 mg; folic acid, 1.5 mg; biotin, 1 mg; Co, 1 mg; Mn, 49 mg; Cu, 6 mg; Zn, 60 mg; I, 2 mg; Se, 0.18 mg.

Supplemental Table S5 Fatty acid composition of the diets

| Fatty acid<br>(g/100g) | Control | High | Medium | Low  | Duck<br>oil | Linseed<br>oil |
|------------------------|---------|------|--------|------|-------------|----------------|
| TFA                    | 5.00    | 4.94 | 4.72   | 4.87 | 70.32       | 68.13          |
| SFA                    | 1.55    | 1.48 | 1.37   | 1.29 | 19.94       | 7.17           |
| MUFA                   | 1.91    | 1.81 | 1.65   | 1.53 | 32.70       | 13.82          |
| PUFA                   | 1.54    | 1.65 | 1.70   | 2.05 | 17.69       | 47.15          |
| ALA (C18:3n3)          | 0.08    | 0.21 | 0.36   | 0.68 | 0.67        | 35.21          |
| Total n-6 PUFA         | 1.45    | 1.42 | 1.33   | 1.35 | 16.76       | 11.75          |
| Total n-3 PUFA         | 0.08    | 0.22 | 0.36   | 0.69 | 0.82        | 35.37          |
| n-6/n-3                | 17.37   | 6.51 | 3.64   | 1.97 | 20.37       | 0.33           |

Note: g/100 g, denominator represented fresh sample weight. TFA: total fatty acids, SFA: saturated fatty acid; MUFA: monounsaturated fatty acids; PUFA: polyunsaturated fatty acids; ALA:  $\alpha$ -linolenic acid; n-6/n-3 PUFA: ratio of n-6 PUFA and n-3 PUFA.

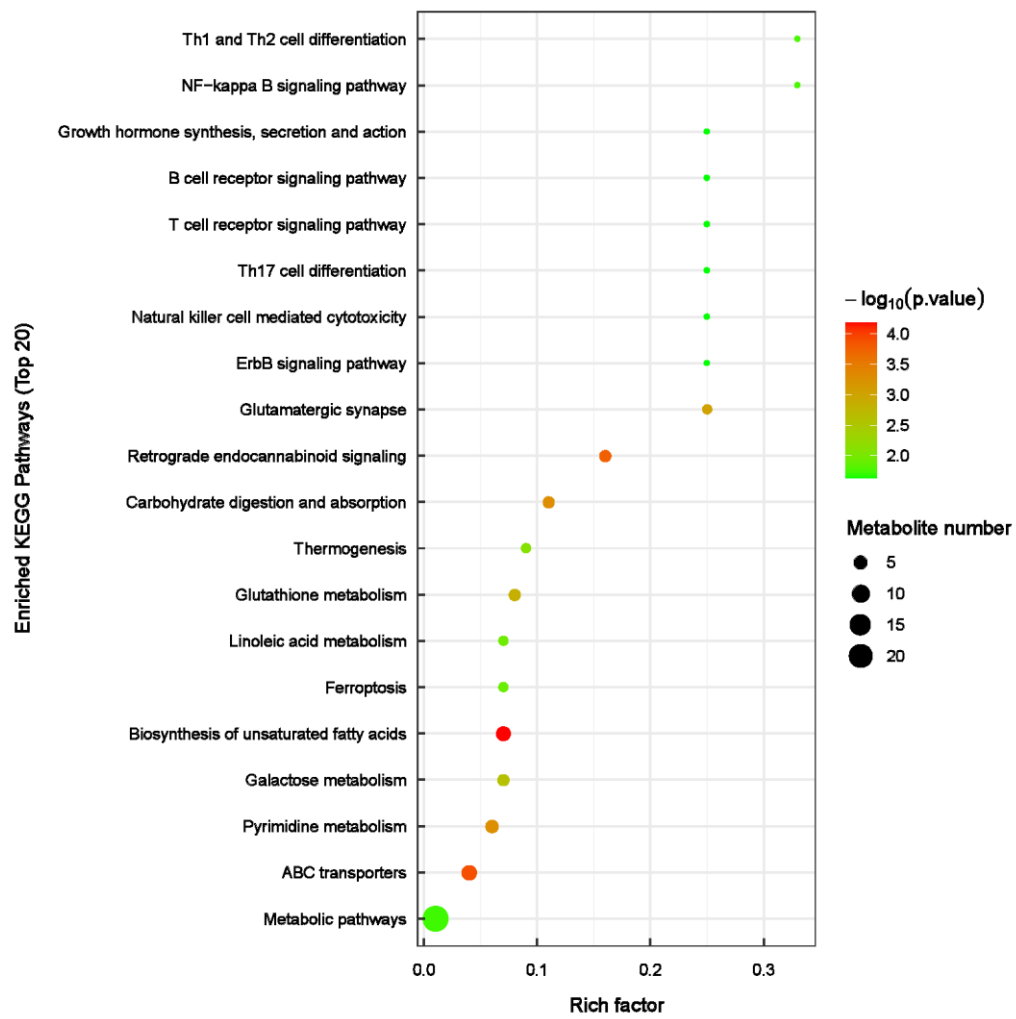

**Supplemental Figure S1.** KEGG pathway enrichment analysis of all differential metabolites.



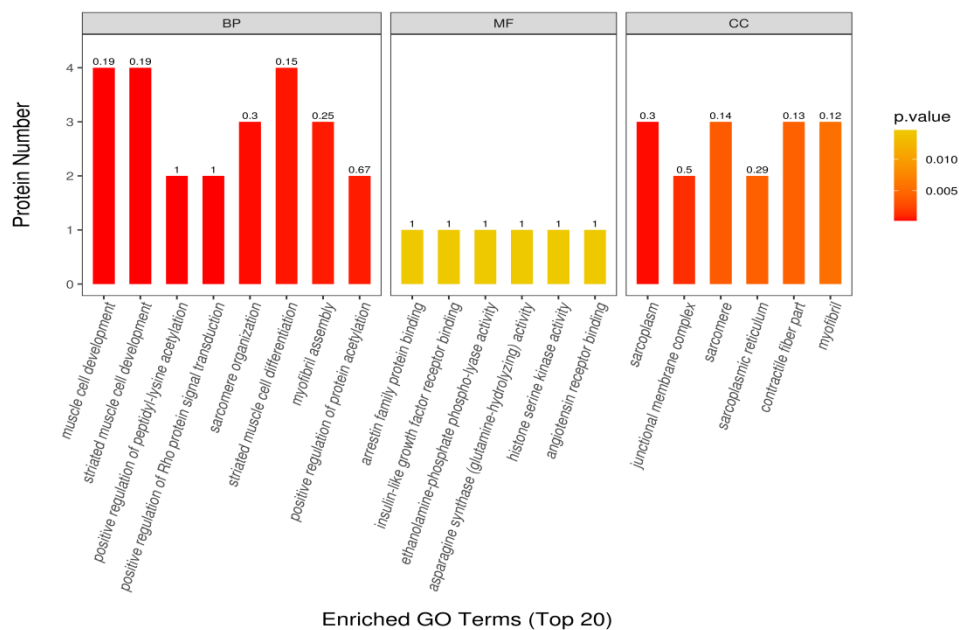

**Supplemental Figure S2.** GO annotation statistics of differential proteins.

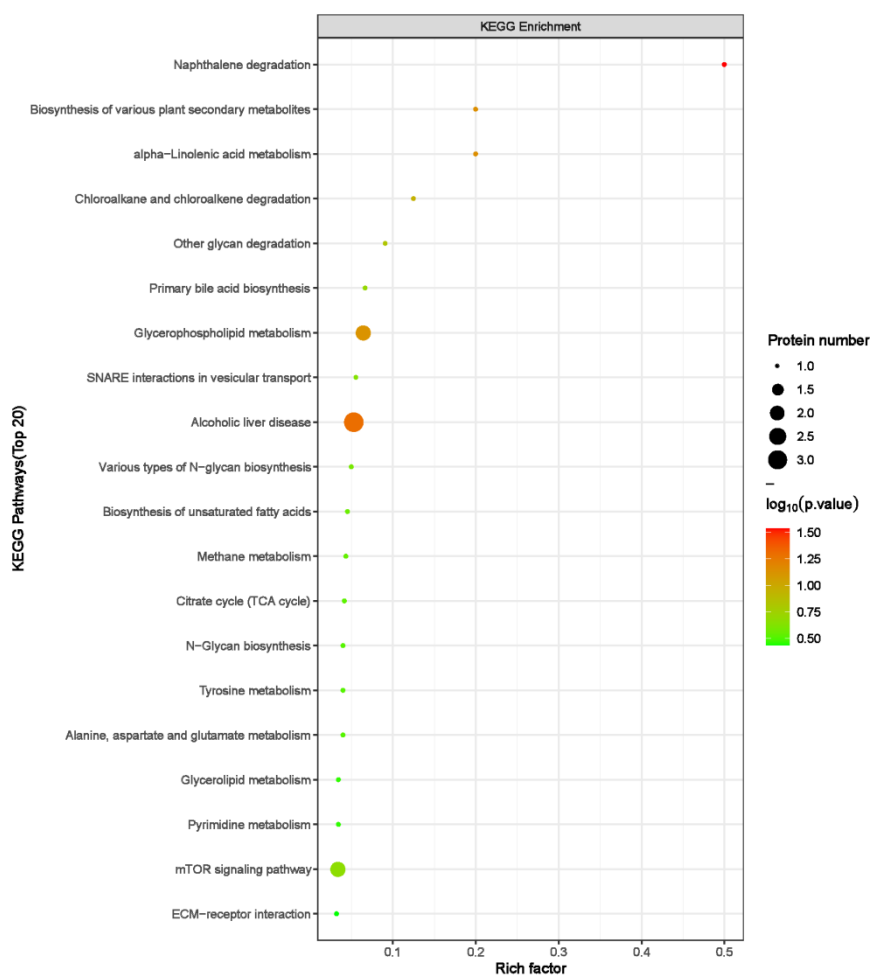

**Supplemental Figure S3.** KEGG pathway enrichment analysis diagram of differential proteins.

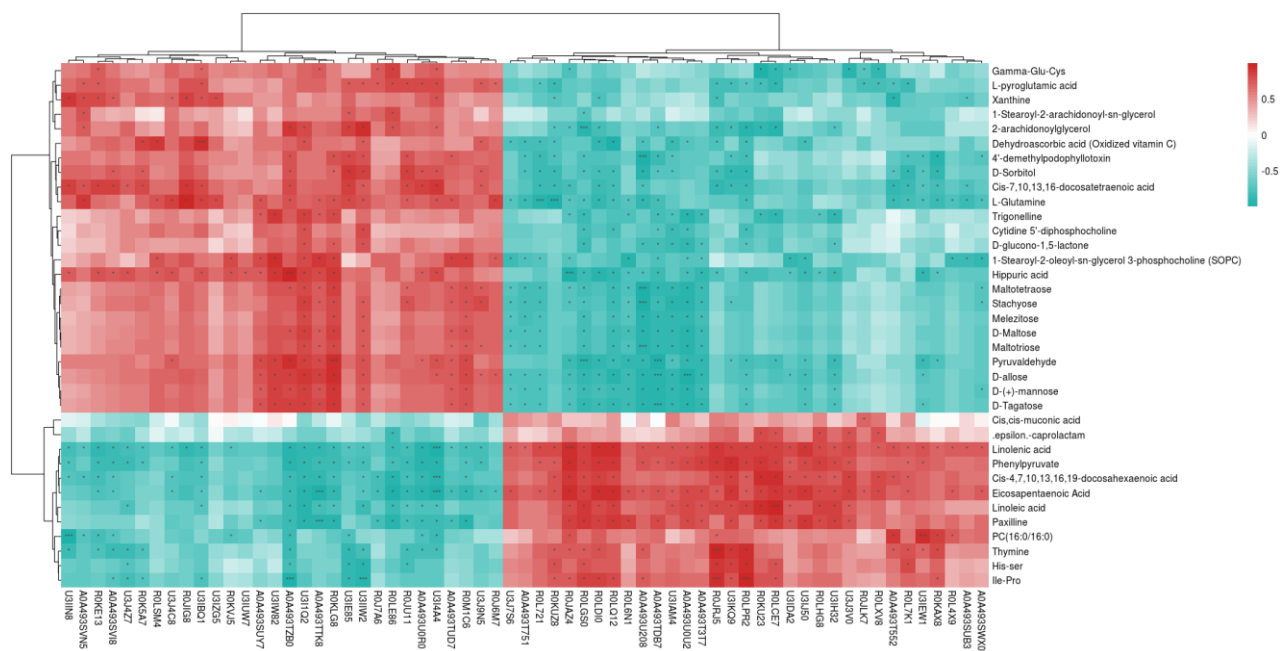

**Supplemental Figure S4.** Heat map of correlation analysis between the differential proteins and differential metabolites.

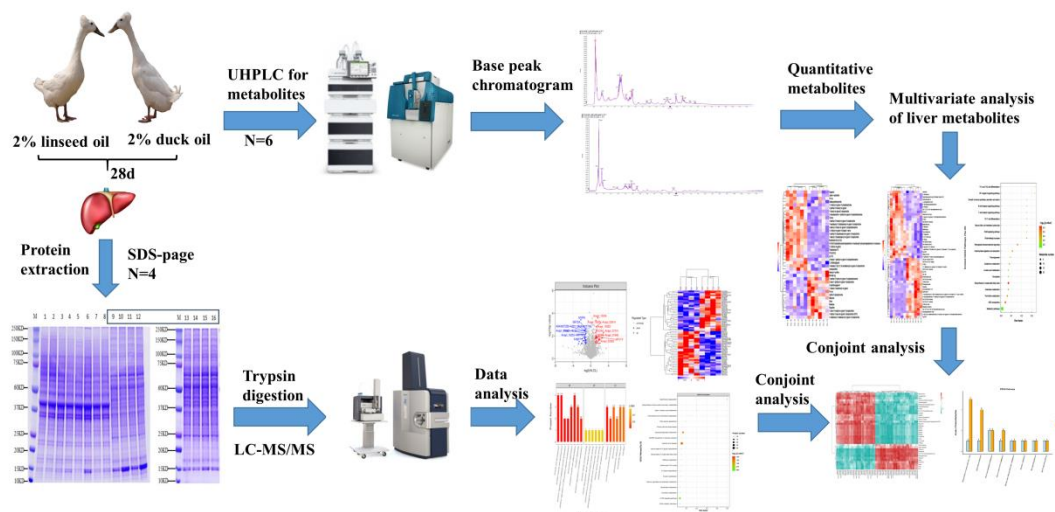

**Supplemental Figure S5.** Experimental design and workflow for the metabolomics and proteomics analysis of duck liver in the linseed oil group and the control group.
